# Supplementary material for: Chloride channels regulate differentiation and barrier functions of the mammalian airway
Source: eLife. 2020 Apr 14;9:e53085. doi: 10.7554/eLife.53085 (PMC7182432; doi:10.7554/eLife.53085)
Supplement: Figure 4—source data 1. [file elife-53085-fig4-data1.xlsx]

## Sheet: PCD 
Primary ciliary dyskinesia
Csf3r
Cenpf
Dnah14
Drc1
Dnah6
Dnah7c,Dnah7b,Dnah7a
Stk36
Zmynd10
Dnah1
Dnah12
Cfap44
Ccdc39
Dnah5
Ccno
Dnah8
Rsph9
Ripply2
Rsph4a
Rsph3a,Rsph3b
Pacrg
Qk
Dnaaf5
Dnah11
Nme8
Galnt11
Spag1
Lrrc6
Dnaic1
Kif27
Odf2
Notch1
Armc4
Poll
Dpcd
Cfap43
Lrrc56
Dnajb13
Cfap300
Dync2h1
Ccdc65
Ccdc63
Dynll1
Wdr66
Dnah10
Dnaaf2
Dnal1
Ak7
Dync1h1
Dyx1c1
Anks3
Arl2bp
Hydin
Dhodh
Dynlrb2
Dnaaf1
Gas8
Dnah2
Dnah9
Ttc25
Ccdc103
Dynll2
Dnaic2
Ccdc40
Tubb4a
Ccdc151
Rsph6a
Ccdc114
Dnaaf3
Cfap298
Rsph1
Ttll1
Rpgr
Pih1h3b,Pih1d3
Mcidas
Odf1

## Sheet: Asthma
Pulmonary & Asthma
Tnfrsf4
Runx3
Ptafr
Ppcs
Ptger3
Clca1
Chia1
Il6ra
Gba
Fcer1a
Fcgr3
Selp
Pla2g4a
Chil1
Il10
Traf5
Alms1
Hnmt
Itgb6
Gad1
Ormdl1
Icos
Slc11a1
Sp110,Gm15753,Gm16026
Hrh1
Cx3cr1
Ccr3
Ccr5
Traip
Cish
Tnfsf10
Kcnmb2
Wdr19
Gabra2
Adh5
Adh1
Nfkb1
Lrba
Tlr2
Il13
Il4
Il9
Scgb3a2
Adrb2
Cd74
Irgm2
Tnip1
Il12b
Gabrb2
Hist1h3d
H2-M3
Lta
Tnf
Fkbp5
Vegfa
Pla2g7
Il17f
Nkain2
Ifngr1
Plg
Ccr6
Tbp
Glcci1
Nod1
Npsr1
Cdhr3
Cftr
Lep
Fabp4
Dock8
Cd274
Pdcd1lg2
Il33
Il11ra1,Gm13305,Gm2002,Il11ra2
Tgfbr1
Abca1
Tnc
Tlr4
Hc
Col5a1
Gad2
Alox5
Pten
Acta2
Hps1
Nfkb2
Muc5ac
Muc5b
Stim1
Ms4a2
Scgb1a1
Sart1
Mmp1a
Mmp12
Tirap
Ptpn6
C3ar1
Clec1a
Clec7a
Mgp
Vdr
Cbx5
Stat6
Irak3
Ifng
Atxn2
Postn
Cysltr2
Phf11b,Phf11c,Phf11d,Phf11a
Il25
Nfkbia
Nkx2-1
Ptgdr
Lgals3
Nek9
Serpina1e,Serpina1c,Serpina1d,Serpina1a,Serpina1b
Jag2
Tyro3
Tpsb2
Crebbp
Adcy9
Il4ra
Il21r
Mmp2
Hsd11b2
Carmil2
Nqo1
Cxcl16
Ccl12
Ccl11
G6pc3
Crhr1
Mapt
Tbx21
Socs3
Serpinb3a
Serpinb3d
Tnfsf14
C3
Cd209e
Il12rb1
Pepd
Rasgrp4
Tgfb1
C5ar1
Il11
Jag1
Cst7
Bpifa1
Itch
Ada
Mmp9
Mc3r
Cxadr
Cbs
Mif
Hmox1
Was
Suv39h1
Cysltr1
Il13ra2

## Sheet: Mucus & goblet cell hyperplasia
Mucosa/epithelium/goblet
A4gnt
Abcc6
Adamtsl2
Adrb2
Aga
Agr3
Aicda
Aire
Akt1
Alox5
Amn
Ap1m2
Apc
Apoa1
Aqp3
Atg16l1
Atm
Atoh1
Aurka
Axin2
B4galnt2
Bax
Bcl10
Bpifa1
Bub1b
C5ar1
Carmil3
Casp1
Casp14
Casp8
Ccl11
Ccl12
Ccn4
Ccnd1
Ccr3
Ccr5
Ccr6
Cd1d1
Cd209e
Cd44
Cd46
Cd8a
Cdc42ep4
Cdcp1
Cdh1
Cdh2
Cdh26
Cdkn2a
Cfb
Cftr
Clca1
Clcn5
Cldn1
Clec7a
Col7a1
Cps1
Ctnnb1
Cubn
Cx3cr1
Cxcl10
Cxcl12
Cxcl17
Cxcr1
Cxcr3
Dcc
Dkc1
Dlc1
Dnaic1
Dnajc10
Dpp4
Dsp
Ece1
Edn1
Ednra
Ednrb
Egfr
Eng
Ep300
Epcam
Erbb2
Esr1
Esr2
Fas
Fasl
Fcgbp
Fcgr3
Fgf4
Fgfr2
Fgfr3
Flcn
Foxi1
Foxl1
Foxp3
Frem1
Fzd7
Gabra2
Gabrb2
Gad1
Gad2
Gal3st2,Gal3st2c,Gal3st2b
Galr1
Gjb2
Gla
Gnas
Gpbar1
Gsn
Guca2b
H2-Aa
H2-Ab1
H2-M3
Hfe
Hmox1
Hnmt
Hrh1
Hsph1
Ifng
Ifngr1
Igf2
Ikbkb
Ikbkg
Il10
Il12b
Il13
Il15
Il17a
Il17c
Il17rc
Il17re
Il18
Il18bp
Il18r1
Il1b
Il1f9
Il1rap
Il1rl1
Il22,Iltifb
Il25
Il33
Il4ra
Il6
Il6st
Il7
Il9
Inha
Irf1
Irgm2
Itgae
Itgb4
Itgb6
Jag1
Jag2
Kit
Klf6
Krt13
Krt14
Krt16
Krt17
Krt20
Krt4
Krt5
Krt72
Krt76
Krt86
Ksr1
Lalba
Lama3
Lamb3
Lamc2
Lep
Lepr
Ltf
Lyst
Lzts1
Macc1
Mapk14
Mark2
Mbd4
Mcc
Mcoln1
Med1
Mfge8
Mlh1
Mlh3
Mmp1a
Mmp3
Mmp7
Mst1r
Muc13
Muc2
Muc5ac
Muc6
Mutyh
Myd88
Ndufa13
Nectin1
Nfil3
Nfkb1
Nfkbia
Nfkbiz
Nkx2-3
Nlrp3
Nlrp6
Nod1
Nod2
Notch1
Nox1
Nr3c2
Nras
Nxpe4
Obp2a
Obp2b
Odc1
Olfm4
Otc
Otud7b
Pax6
Pdgfrl
Pdpn
Pigr
Pik3ca
Pla2g7
Plg
Pou2f3
Prap1
Prnp
Prom1
Prtn3
Ptch1
Ptch2
Pten
Ptger4
Ptpn12
Ptprj
Ptprz1
Pycard
Rab25
Rad54b
Reg1
Reg3b
Reg3g
Reg4
Rela
Rem1
Ret
Retnlb
Rhbdf2
Ripk1
Rnf43
Rnf6
Rorc
Rps3
Runx3
Sar1b
Scgb1a1
Scgb3a2
Scnn1a
Scnn1b
Scnn1g
Sdc1
Serpinb13
Sftpd
Slc26a3
Slc30a2
Slc39a4
Slc40a1
Slc5a5
Slc6a19
Slc6a6
Slpi
Smad3
Smad4
Smad7
Smpd1
Spdef
Spink5
Src
St6gal1
Stat3
Stk11
Stx2
Sufu
Tacr1
Tcf7l1
Tek
Tert
Tfap2a
Tff1
Tff2
Tff3
Tgfb1
Tgfbr2
Tlr2
Tlr3
Tlr4
Tlr5
Tmeff2
Tmem97
Tnf
Tnfrsf11a
Tnfrsf14
Traf6
Trp53
Trpm5
Trpv3
Tsc1
Ttc7
Twnk
Ugt2a1
Unc93b1
Vegfa
Vsig1
Was
Wwox
Xdh
Yap1
Yes1
Zg16
Zkscan3
